# Supplementary material
Source: PubMed Central journal article supplement (PMC6445392)
Supplement: NIHMS1012093-supplement-Supplement.pdf [file NIHMS1012093-supplement-Supplement.pdf]

**Supplement Table 1. Metabolites Identified in the Myocardium of MI and Sham Rabbits.a**

| Network module | Compound               | KEGG Identifier | Left Ventricular Free Wall |          |          |       | Intraventricular Septum |          |          |       | Right Ventricle |          |          |       |
|----------------|------------------------|-----------------|----------------------------|----------|----------|-------|-------------------------|----------|----------|-------|-----------------|----------|----------|-------|
|                |                        |                 | MI/Sham                    | Raw data | Log data | FDR   | MI/Sham                 | Raw data | Log data | FDR   | MI/Sham         | Raw data | Log data | FDR   |
| Amines         | phosphoethanolamine    | C00346          | 0.767                      | 0.083    | 0.043    | 0.636 | 0.950                   | 0.659    | 0.694    | 0.903 | 0.816           | 0.291    | 0.376    | 0.989 |
|                | hydroxylamine          | C00192          | 0.926                      | 0.686    | 0.531    | 0.894 | 0.868                   | 0.182    | 0.160    | 0.691 | 1.332           | 0.450    | 0.358    | 0.989 |
|                | ethanolamine           | C00189          | 0.778                      | 0.268    | 0.215    | 0.763 | 0.771                   | 0.059    | 0.038    | 0.540 | 0.930           | 0.605    | 0.442    | 0.989 |
|                | lactamide              |                 | 0.768                      | 0.425    | 0.400    | 0.820 | 1.174                   | 0.446    | 0.713    | 0.827 | 0.839           | 0.088    | 0.078    | 0.989 |
| Amino Acids    | 3-aminoisobutyric acid | C05145          | 1.587                      | 0.058    | 0.088    | 0.551 | 1.253                   | 0.263    | 0.278    | 0.758 | 0.989           | 0.970    | 0.886    | 0.992 |
|                | oxoproline             | C01879          | 0.896                      | 0.241    | 0.173    | 0.747 | 0.906                   | 0.146    | 0.126    | 0.670 | 0.895           | 0.165    | 0.180    | 0.989 |
|                | hippuric acid          | C01586          | 0.725                      | 0.307    | 0.240    | 0.792 | 0.849                   | 0.609    | 0.372    | 0.891 | 0.840           | 0.563    | 0.566    | 0.989 |
|                | creatinine             | C00791          | 0.629                      | 0.156    | 0.069    | 0.706 | 0.822                   | 0.214    | 0.206    | 0.704 | 0.793           | 0.560    | 0.349    | 0.989 |
|                | n-acetylglutamate      | C00624          | 0.527                      | 0.288    | 0.116    | 0.763 | 0.801                   | 0.524    | 0.561    | 0.871 | 0.704           | 0.479    | 0.184    | 0.989 |
|                | isoleucine             | C00407          | 1.083                      | 0.450    | 0.448    | 0.824 | 0.952                   | 0.518    | 0.513    | 0.868 | 0.924           | 0.470    | 0.471    | 0.989 |
|                | asparagine             | C00152          | 0.850                      | 0.381    | 0.441    | 0.811 | 1.063                   | 0.695    | 0.645    | 0.916 | 1.709           | 0.257    | 0.209    | 0.989 |
|                | putrescine             | C00138          | 0.963                      | 0.759    | 0.756    | 0.914 | 1.031                   | 0.865    | 0.836    | 0.964 | 1.060           | 0.617    | 0.611    | 0.989 |
|                | leucine                | C00123          | 0.956                      | 0.818    | 0.970    | 0.929 | 0.944                   | 0.611    | 0.506    | 0.891 | 1.029           | 0.885    | 0.858    | 0.989 |
|                | beta-alanine           | C00099          | 0.734                      | 0.284    | 0.119    | 0.763 | 0.557                   | 0.013    | 0.014    | 0.385 | 0.731           | 0.363    | 0.154    | 0.989 |
|                | methionine             | C00073          | 1.120                      | 0.556    | 0.466    | 0.864 | 1.111                   | 0.415    | 0.505    | 0.809 | 1.220           | 0.012    | 0.016    | 0.989 |
|                | glutamine              | C00064          | 1.074                      | 0.847    | 0.542    | 0.932 | 0.886                   | 0.732    | 0.606    | 0.926 | 1.184           | 0.627    | 0.662    | 0.989 |
|                | glutathione            | C00051          | 1.033                      | 0.807    | 0.963    | 0.929 | 1.768                   | 0.003    | 0.003    | 0.276 | 1.360           | 0.144    | 0.263    | 0.989 |
|                | aspartic acid          | C00049          | 1.553                      | 0.082    | 0.273    | 0.636 | 1.875                   | 0.046    | 0.070    | 0.540 | 0.992           | 0.975    | 0.872    | 0.992 |
|                | lysine                 | C00047          | 0.979                      | 0.930    | 0.969    | 0.964 | 0.823                   | 0.469    | 0.612    | 0.846 | 0.953           | 0.807    | 0.632    | 0.989 |
|                | alanine                | C00041          | 0.802                      | 0.567    | 0.707    | 0.864 | 0.730                   | 0.380    | 0.465    | 0.779 | 0.765           | 0.334    | 0.154    | 0.989 |
|                | glycine                | C00037          | 1.078                      | 0.394    | 0.495    | 0.813 | 1.056                   | 0.519    | 0.643    | 0.868 | 1.080           | 0.576    | 0.603    | 0.989 |
|                | glutamic acid          | C00025          | 1.432                      | 0.269    | 0.245    | 0.763 | 1.880                   | 0.096    | 0.268    | 0.594 | 1.292           | 0.376    | 0.333    | 0.989 |
|                | alpha-aminoadipic acid | C00956          | 1.101                      | 0.629    | 0.500    | 0.877 | 1.198                   | 0.251    | 0.505    | 0.758 | 1.236           | 0.316    | 0.555    | 0.989 |
|                | taurine                | C00245          | 3.499                      | 0.001    | 0.007    | 0.140 | 1.899                   | 0.001    | 0.000    | 0.157 | 3.156           | 0.036    | 0.083    | 0.989 |
| threonine      | C00188                 | 0.963           | 0.818                      | 0.887    | 0.929    | 1.004 | 0.966                   | 0.975    | 0.988    | 1.390 | 0.069           | 0.068    | 0.989    |       |
| valine         | C00183                 | 1.127           | 0.612                      | 0.433    | 0.864    | 0.944 | 0.440                   | 0.435    | 0.827    | 0.978 | 0.863           | 0.661    | 0.989    |       |
| tyrosine       | C00082                 | 1.027           | 0.758                      | 0.852    | 0.914    | 0.921 | 0.360                   | 0.306    | 0.779    | 0.971 | 0.848           | 0.703    | 0.989    |       |
| phenylalanine  | C00079                 | 1.445           | 0.047                      | 0.075    | 0.551    | 1.582 | 0.040                   | 0.048    | 0.531    | 1.192 | 0.225           | 0.314    | 0.989    |       |
| tryptophan     | C00078                 | 1.092           | 0.446                      | 0.476    | 0.824    | 1.150 | 0.120                   | 0.121    | 0.634    | 1.107 | 0.490           | 0.753    | 0.989    |       |
| serine         | C00065                 | 1.276           | 0.110                      | 0.150    | 0.637    | 0.932 | 0.621                   | 0.451    | 0.891    | 1.027 | 0.748           | 0.942    | 0.989    |       |
| Aromatics      | salicylic acid         | C00805          | 0.815                      | 0.557    | 0.434    | 0.864 | 0.996                   | 0.987    | 0.978    | 0.995 | 0.773           | 0.421    | 0.451    | 0.989 |
|                | noradrenaline          | C00547          | 0.722                      | 0.161    | 0.055    | 0.706 | 0.760                   | 0.110    | 0.071    | 0.619 | 0.957           | 0.867    | 0.940    | 0.989 |
|                | benzoic acid           | C00180          | 1.301                      | 0.264    | 0.277    | 0.763 | 0.765                   | 0.009    | 0.004    | 0.372 | 1.263           | 0.470    | 0.383    | 0.989 |
| Fatty Acids    | palmitoleic acid       | C08362          | 1.102                      | 0.645    | 0.772    | 0.890 | 0.674                   | 0.017    | 0.013    | 0.425 | 1.334           | 0.341    | 0.747    | 0.989 |

Supplement Table 1. Metabolites Identified in the Myocardium of MI and Sham Rabbits.a

| Network module    | Compound                  | KEGG Identifier | Left Ventricular Free Wall |                  |                  |       | Intraventricular Septum |                  |                  |       | Right Ventricle |                  |                  |       |
|-------------------|---------------------------|-----------------|----------------------------|------------------|------------------|-------|-------------------------|------------------|------------------|-------|-----------------|------------------|------------------|-------|
|                   |                           |                 | MI/Sham Mean               | Raw data p value | Log data p value | FDR   | MI/Sham Mean            | Raw data p value | Log data p value | FDR   | MI/Sham Mean    | Raw data p value | Log data p value | FDR   |
|                   | linolenic acid            | C06427          | 1.334                      | 0.056            | 0.046            | 0.551 | 1.057                   | 0.663            | 0.713            | 0.903 | 1.099           | 0.486            | 0.641            | 0.989 |
|                   | arachidic acid            | C06425          | 1.255                      | 0.181            | 0.212            | 0.713 | 1.181                   | 0.328            | 0.877            | 0.779 | 0.836           | 0.447            | 0.285            | 0.989 |
|                   | myristic acid             | C06424          | 0.950                      | 0.738            | 0.602            | 0.914 | 1.163                   | 0.293            | 0.421            | 0.779 | 1.194           | 0.356            | 0.406            | 0.989 |
|                   | lauric acid               | C02679          | 1.018                      | 0.922            | 0.735            | 0.964 | 1.018                   | 0.890            | 0.920            | 0.964 | 1.152           | 0.290            | 0.336            | 0.989 |
|                   | pelargonic acid           | C01601          | 1.138                      | 0.351            | 0.511            | 0.807 | 1.116                   | 0.331            | 0.323            | 0.779 | 0.936           | 0.768            | 0.846            | 0.989 |
|                   | linoleic acid             | C01595          | 1.141                      | 0.471            | 0.642            | 0.830 | 1.000                   | 0.998            | 0.999            | 0.998 | 1.171           | 0.481            | 0.610            | 0.989 |
|                   | capric acid               | C01571          | 1.237                      | 0.266            | 0.266            | 0.763 | 0.971                   | 0.885            | 0.810            | 0.964 | 0.910           | 0.621            | 0.545            | 0.989 |
|                   | stearic acid              | C01530          | 1.166                      | 0.125            | 0.162            | 0.683 | 0.946                   | 0.528            | 0.604            | 0.871 | 1.033           | 0.845            | 0.923            | 0.989 |
|                   | oleic acid                | C00712          | 0.984                      | 0.925            | 0.755            | 0.964 | 0.969                   | 0.885            | 0.856            | 0.964 | 0.975           | 0.902            | 0.655            | 0.989 |
|                   | palmitic acid             | C00249          | 1.157                      | 0.252            | 0.323            | 0.759 | 1.055                   | 0.541            | 0.532            | 0.879 | 0.945           | 0.704            | 0.692            | 0.989 |
|                   | arachidonic acid          | C00219          | 0.850                      | 0.522            | 0.633            | 0.860 | 0.965                   | 0.888            | 0.653            | 0.964 | 1.044           | 0.858            | 0.422            | 0.989 |
|                   | heptadecanoic acid        |                 | 1.244                      | 0.081            | 0.126            | 0.636 | 0.956                   | 0.768            | 0.605            | 0.935 | 0.976           | 0.891            | 0.960            | 0.989 |
|                   | hexadecane                |                 | 0.852                      | 0.577            | 0.522            | 0.864 | 1.279                   | 0.319            | 0.525            | 0.779 | 0.679           | 0.231            | 0.253            | 0.989 |
| Glycolysis        | 3-phosphoglycerate        | C00597          | 0.957                      | 0.918            | 0.849            | 0.964 | 1.512                   | 0.055            | 0.072            | 0.540 | 1.033           | 0.880            | 0.959            | 0.989 |
|                   | glucose                   | C00221          | 1.019                      | 0.952            | 0.540            | 0.968 | 1.279                   | 0.351            | 0.257            | 0.779 | 1.059           | 0.770            | 0.581            | 0.989 |
|                   | fructose-1,6-bisphosphate | C05378          | 1.385                      | 0.216            | 0.248            | 0.713 | 1.346                   | 0.378            | 0.567            | 0.779 | 0.960           | 0.859            | 0.875            | 0.989 |
|                   | fructose-6-phosphate      | C05345          | 0.830                      | 0.728            | 0.425            | 0.914 | 0.977                   | 0.953            | 0.674            | 0.980 | 0.758           | 0.546            | 0.891            | 0.989 |
|                   | glucose-6-phosphate       | C00092          | 0.720                      | 0.557            | 0.467            | 0.864 | 0.914                   | 0.834            | 0.637            | 0.959 | 0.833           | 0.685            | 0.937            | 0.989 |
|                   | pyruvic acid              | C00022          | 1.134                      | 0.535            | 0.537            | 0.864 | 1.397                   | 0.116            | 0.166            | 0.630 | 1.232           | 0.174            | 0.257            | 0.989 |
| Ketones           | 3-hydroxybutyric acid     | C01089          | 0.730                      | 0.553            | 0.862            | 0.864 | 0.703                   | 0.320            | 0.160            | 0.779 | 0.718           | 0.326            | 0.652            | 0.989 |
|                   | 4-hydroxybutyric acid     | C00989          | 0.815                      | 0.373            | 0.296            | 0.807 | 0.809                   | 0.306            | 0.360            | 0.779 | 1.168           | 0.564            | 0.702            | 0.989 |
|                   | 2-hydroxyvaleric acid     |                 | 0.755                      | 0.150            | 0.182            | 0.706 | 0.645                   | 0.060            | 0.058            | 0.540 | 0.662           | 0.040            | 0.043            | 0.989 |
| Monoacylglycerols | 1-monostearin             | D01947          | 1.194                      | 0.786            | 0.763            | 0.923 | 0.867                   | 0.727            | 0.110            | 0.926 | 4.578           | 0.083            | 0.185            | 0.989 |
|                   | 1-monopalmitin            | C01885          | 0.909                      | 0.860            | 0.853            | 0.937 | 0.926                   | 0.836            | 0.465            | 0.959 | 2.123           | 0.246            | 0.594            | 0.989 |
|                   | 1-monoolein               |                 | 1.046                      | 0.791            | 0.872            | 0.925 | 0.978                   | 0.917            | 0.858            | 0.967 | 0.933           | 0.573            | 0.470            | 0.989 |
|                   | 2-monoolein               |                 | 1.244                      | 0.062            | 0.066            | 0.551 | 1.104                   | 0.593            | 0.513            | 0.882 | 1.240           | 0.252            | 0.314            | 0.989 |
| Organic Acids     | threonic acid             | C01620          | 0.881                      | 0.477            | 0.378            | 0.830 | 0.841                   | 0.504            | 0.552            | 0.864 | 1.514           | 0.038            | 0.059            | 0.989 |
|                   | aminomalonnate            | C00872          | 0.719                      | 0.001            | 0.001            | 0.140 | 0.865                   | 0.268            | 0.224            | 0.758 | 1.031           | 0.771            | 0.762            | 0.989 |
|                   | glyceric acid             | C00258          | 1.089                      | 0.677            | 0.779            | 0.894 | 0.994                   | 0.955            | 0.978            | 0.980 | 0.876           | 0.603            | 0.798            | 0.989 |
|                   | oxalic acid               | C00209          | 1.142                      | 0.579            | 0.643            | 0.864 | 0.870                   | 0.315            | 0.376            | 0.779 | 0.994           | 0.981            | 0.990            | 0.992 |
|                   | glycolic acid             | C00160          | 1.045                      | 0.739            | 0.868            | 0.914 | 1.036                   | 0.734            | 0.711            | 0.926 | 0.849           | 0.678            | 0.920            | 0.989 |
| Pentose Phosphate | ribulose-5-phosphate      | C00199          | 0.653                      | 0.061            | 0.093            | 0.551 | 0.976                   | 0.884            | 0.632            | 0.964 | 0.899           | 0.681            | 0.978            | 0.989 |
| Pathway           | ribose-5-phosphate        | C00117          | 0.711                      | 0.172            | 0.200            | 0.706 | 0.846                   | 0.302            | 0.343            | 0.779 | 1.077           | 0.516            | 0.488            | 0.989 |
| Phosphates        | pyrophosphate             | C00013          | 1.232                      | 0.584            | 0.754            | 0.864 | 1.043                   | 0.882            | 0.887            | 0.964 | 0.949           | 0.844            | 0.854            | 0.989 |

**Supplement Table 1. Metabolites Identified in the Myocardium of MI and Sham Rabbits.a**

| Network module   | Compound                     | KEGG Identifier | Left Ventricular Free Wall |                  |                  |       | Intraventricular Septum |                  |                  |       | Right Ventricle |                  |                  |       |
|------------------|------------------------------|-----------------|----------------------------|------------------|------------------|-------|-------------------------|------------------|------------------|-------|-----------------|------------------|------------------|-------|
|                  |                              |                 | MI/Sham Mean               | Raw data p value | Log data p value | FDR   | MI/Sham Mean            | Raw data p value | Log data p value | FDR   | MI/Sham Mean    | Raw data p value | Log data p value | FDR   |
|                  | phosphate                    | C00009          | 0.723                      | 0.104            | 0.135            | 0.637 | 0.751                   | 0.203            | 0.144            | 0.704 | 0.809           | 0.132            | 0.085            | 0.989 |
|                  | methanolphosphate            |                 | 1.970                      | 0.017            | 0.082            | 0.378 | 0.959                   | 0.888            | 0.766            | 0.964 | 0.733           | 0.345            | 0.584            | 0.989 |
| Purines          | inosine                      | C00294          | 1.439                      | 0.011            | 0.031            | 0.345 | 1.358                   | 0.011            | 0.023            | 0.385 | 1.719           | 0.025            | 0.025            | 0.989 |
|                  | hypoxanthine                 | C00262          | 1.102                      | 0.507            | 0.494            | 0.848 | 0.867                   | 0.347            | 0.299            | 0.779 | 1.537           | 0.041            | 0.040            | 0.989 |
|                  | inosine 5'-monophosphate     | C00130          | 1.113                      | 0.752            | 0.840            | 0.914 | 1.513                   | 0.495            | 0.251            | 0.856 | 1.568           | 0.341            | 0.643            | 0.989 |
|                  | adenosine-5-monophosphate    | C00020          | 1.078                      | 0.775            | 0.997            | 0.921 | 0.818                   | 0.438            | 0.508            | 0.827 | 0.756           | 0.285            | 0.283            | 0.989 |
| Pyrimidines      | uridine                      | C00299          | 0.879                      | 0.666            | 0.608            | 0.894 | 1.128                   | 0.732            | 0.605            | 0.926 | 1.037           | 0.913            | 0.902            | 0.989 |
|                  | uracil                       | C00106          | 1.097                      | 0.706            | 0.577            | 0.903 | 1.044                   | 0.899            | 0.606            | 0.964 | 1.291           | 0.406            | 0.483            | 0.989 |
| Sterols          | dihydrocholesterol           | C12978          | 1.237                      | 0.149            | 0.217            | 0.706 | 1.072                   | 0.683            | 0.539            | 0.909 | 1.088           | 0.685            | 0.740            | 0.989 |
|                  | squalene                     | C00751          | 0.873                      | 0.364            | 0.256            | 0.807 | 0.905                   | 0.687            | 0.859            | 0.909 | 0.915           | 0.562            | 0.367            | 0.989 |
|                  | tocopherol alpha-cholesterol | C00376          | 0.779                      | 0.091            | 0.055            | 0.637 | 0.857                   | 0.383            | 0.594            | 0.781 | 0.961           | 0.796            | 0.871            | 0.989 |
|                  | cholesterol                  | C00187          | 1.091                      | 0.199            | 0.242            | 0.713 | 0.962                   | 0.548            | 0.557            | 0.879 | 1.199           | 0.025            | 0.033            | 0.989 |
| Sugars           | n-acetyl-d-hexosamine        | C03878          | 1.388                      | 0.068            | 0.153            | 0.575 | 1.071                   | 0.645            | 0.829            | 0.903 | 1.233           | 0.130            | 0.217            | 0.989 |
|                  | cellobiose                   | C01971          | 1.234                      | 0.341            | 0.376            | 0.807 | 1.018                   | 0.931            | 0.970            | 0.975 | 1.185           | 0.422            | 0.809            | 0.989 |
|                  | maltotriose                  | C01835          | 1.160                      | 0.579            | 0.399            | 0.864 | 1.284                   | 0.366            | 0.273            | 0.779 | 1.304           | 0.392            | 0.427            | 0.989 |
|                  | arabinose                    | C00216          | 0.719                      | 0.313            | 0.681            | 0.793 | 0.810                   | 0.464            | 0.154            | 0.845 | 1.702           | 0.079            | 0.082            | 0.989 |
|                  | maltose                      | C00208          | 1.255                      | 0.215            | 0.237            | 0.713 | 1.023                   | 0.917            | 0.822            | 0.967 | 1.418           | 0.184            | 0.214            | 0.989 |
|                  | mannose                      | C00159          | 0.856                      | 0.667            | 0.946            | 0.894 | 1.315                   | 0.368            | 0.323            | 0.779 | 1.556           | 0.078            | 0.055            | 0.989 |
|                  | ribose                       | C00121          | 0.666                      | 0.121            | 0.075            | 0.683 | 1.024                   | 0.929            | 0.515            | 0.975 | 1.711           | 0.095            | 0.099            | 0.989 |
|                  | sucrose                      | C00089          | 0.485                      | 0.364            | 0.210            | 0.807 | 0.619                   | 0.403            | 0.371            | 0.809 | 1.059           | 0.887            | 0.999            | 0.989 |
|                  | UDP GlcNAc                   | C00043          | 1.048                      | 0.812            | 0.990            | 0.929 | 1.105                   | 0.553            | 0.479            | 0.879 | 0.894           | 0.561            | 0.578            | 0.989 |
|                  | conduritol-beta-epoxide      |                 | 0.765                      | 0.226            | 0.197            | 0.724 | 0.673                   | 0.050            | 0.079            | 0.540 | 0.792           | 0.209            | 0.241            | 0.989 |
|                  | levoglucosan                 |                 | 1.230                      | 0.505            | 0.763            | 0.848 | 1.115                   | 0.659            | 0.478            | 0.903 | 0.899           | 0.848            | 0.771            | 0.989 |
| Sugar Acids      | dehydroascorbic acid         | C05422          | 1.117                      | 0.609            | 0.792            | 0.864 | 1.803                   | 0.006            | 0.009            | 0.344 | 0.918           | 0.699            | 0.808            | 0.989 |
|                  | ribonic acid                 | C01685          | 1.260                      | 0.101            | 0.308            | 0.637 | 1.126                   | 0.335            | 0.458            | 0.779 | 1.196           | 0.372            | 0.419            | 0.989 |
| Sugar Alcohols   | pinitol                      | C03844          | 1.291                      | 0.215            | 0.268            | 0.713 | 0.977                   | 0.897            | 0.592            | 0.964 | 1.211           | 0.316            | 0.387            | 0.989 |
|                  | arabitol                     | C01904          | 0.723                      | 0.564            | 0.613            | 0.864 | 1.273                   | 0.414            | 0.366            | 0.809 | 1.065           | 0.619            | 0.893            | 0.989 |
|                  | sorbitol                     | C00794          | 1.139                      | 0.692            | 0.640            | 0.896 | 1.394                   | 0.419            | 0.297            | 0.809 | 2.207           | 0.052            | 0.149            | 0.989 |
|                  | lyxitol                      | C00532          | 0.702                      | 0.513            | 0.802            | 0.850 | 1.026                   | 0.898            | 0.728            | 0.964 | 1.018           | 0.938            | 0.775            | 0.989 |
|                  | hexitol                      | C00392          | 1.028                      | 0.913            | 0.978            | 0.964 | 0.930                   | 0.739            | 0.795            | 0.926 | 1.098           | 0.707            | 0.706            | 0.989 |
|                  | myo-inositol                 | C00137          | 0.787                      | 0.012            | 0.011            | 0.345 | 0.870                   | 0.078            | 0.064            | 0.567 | 0.864           | 0.127            | 0.094            | 0.989 |
|                  | glycerol                     | C00116          | 1.224                      | 0.236            | 0.397            | 0.737 | 0.621                   | 0.020            | 0.014            | 0.462 | 1.054           | 0.753            | 0.778            | 0.989 |
| Sugar Phosphates | inositol-4-monophosphate     | C03546          | 1.506                      | 0.204            | 0.232            | 0.713 | 1.212                   | 0.336            | 0.308            | 0.779 | 0.894           | 0.688            | 0.673            | 0.989 |
|                  | glycerol-alpha-phosphate     | C03189          | 0.738                      | 0.279            | 0.203            | 0.763 | 1.111                   | 0.620            | 0.684            | 0.891 | 0.791           | 0.504            | 0.295            | 0.989 |

**Supplement Table 1. Metabolites Identified in the Myocardium of MI and Sham Rabbits.a**

| Network module | Compound                                                                                                                                                                                                                                                                                                                       | KEGG Identifier | Left Ventricular Free Wall |                  |                  |       | Intraventricular Septum |                  |                  |       | Right Ventricle |                  |                  |       |
|----------------|--------------------------------------------------------------------------------------------------------------------------------------------------------------------------------------------------------------------------------------------------------------------------------------------------------------------------------|-----------------|----------------------------|------------------|------------------|-------|-------------------------|------------------|------------------|-------|-----------------|------------------|------------------|-------|
|                |                                                                                                                                                                                                                                                                                                                                |                 | MI/Sham Mean               | Raw data p value | Log data p value | FDR   | MI/Sham Mean            | Raw data p value | Log data p value | FDR   | MI/Sham Mean    | Raw data p value | Log data p value | FDR   |
|                | hexose-6-phosphate                                                                                                                                                                                                                                                                                                             | C02965          | 0.622                      | 0.436            | 0.631            | 0.822 | 0.777                   | 0.581            | 0.810            | 0.882 | 0.877           | 0.761            | 0.913            | 0.989 |
|                | galactose-6-phosphate                                                                                                                                                                                                                                                                                                          | C01113          | 1.154                      | 0.783            | 0.485            | 0.923 | 2.607                   | 0.363            | 0.871            | 0.779 | 1.218           | 0.298            | 0.402            | 0.989 |
|                | fructose-1-phosphate                                                                                                                                                                                                                                                                                                           | C01094          | 0.242                      | 0.398            | 0.721            | 0.813 | 1.493                   | 0.231            | 0.245            | 0.729 | 1.161           | 0.568            | 0.801            | 0.989 |
|                | glucose-1-phosphate                                                                                                                                                                                                                                                                                                            | C00103          | 1.241                      | 0.491            | 0.333            | 0.844 | 1.098                   | 0.791            | 0.377            | 0.938 | 1.021           | 0.947            | 0.751            | 0.989 |
| Sulfate        | sulfuric acid                                                                                                                                                                                                                                                                                                                  | C00059          | 2.143                      | 0.020            | 0.035            | 0.402 | 0.996                   | 0.986            | 0.639            | 0.995 | 1.475           | 0.155            | 0.369            | 0.989 |
| TCA Cycle      | 2-hydroxyglutaric acid                                                                                                                                                                                                                                                                                                         | C02630          | 0.962                      | 0.875            | 0.943            | 0.947 | 1.378                   | 0.092            | 0.115            | 0.590 | 0.843           | 0.315            | 0.298            | 0.989 |
|                | lactic acid                                                                                                                                                                                                                                                                                                                    | C01432          | 1.076                      | 0.706            | 0.760            | 0.903 | 1.198                   | 0.322            | 0.314            | 0.779 | 0.917           | 0.463            | 0.317            | 0.989 |
|                | malic acid                                                                                                                                                                                                                                                                                                                     | C00711          | 0.837                      | 0.465            | 0.404            | 0.830 | 0.931                   | 0.765            | 0.733            | 0.935 | 0.740           | 0.205            | 0.211            | 0.989 |
|                | isocitric acid                                                                                                                                                                                                                                                                                                                 | C00451          | 0.894                      | 0.562            | 0.531            | 0.864 | 0.817                   | 0.425            | 0.604            | 0.816 | 0.945           | 0.752            | 0.845            | 0.989 |
|                | citric acid                                                                                                                                                                                                                                                                                                                    | C00158          | 0.821                      | 0.391            | 0.415            | 0.811 | 0.811                   | 0.483            | 0.790            | 0.850 | 0.959           | 0.823            | 0.624            | 0.989 |
|                | fumaric acid                                                                                                                                                                                                                                                                                                                   | C00122          | 0.679                      | 0.189            | 0.103            | 0.713 | 1.017                   | 0.942            | 0.955            | 0.980 | 0.716           | 0.194            | 0.187            | 0.989 |
|                | succinic acid                                                                                                                                                                                                                                                                                                                  | C00042          | 0.858                      | 0.578            | 0.756            | 0.864 | 0.706                   | 0.049            | 0.025            | 0.540 | 0.645           | 0.026            | 0.014            | 0.989 |
|                | alpha-ketoglutarate                                                                                                                                                                                                                                                                                                            | C00026          | 1.017                      | 0.844            | 0.962            | 0.931 | 1.159                   | 0.224            | 0.235            | 0.727 | 1.030           | 0.838            | 0.951            | 0.989 |
| Urea Cycle     | urea                                                                                                                                                                                                                                                                                                                           | C00086          | 0.835                      | 0.032            | 0.028            | 0.491 | 0.839                   | 0.108            | 0.101            | 0.619 | 1.005           | 0.972            | 0.801            | 0.992 |
|                | hydroxycarbamate NIST                                                                                                                                                                                                                                                                                                          |                 | 0.726                      | 0.103            | 0.170            | 0.637 | 0.761                   | 0.024            | 0.020            | 0.481 | 1.313           | 0.325            | 0.348            | 0.989 |
| Vitamins       | pantothenic acid                                                                                                                                                                                                                                                                                                               | C12276          | 0.814                      | 0.101            | 0.115            | 0.637 | 1.426                   | 0.141            | 0.149            | 0.660 | 0.868           | 0.388            | 0.313            | 0.989 |
|                | nicotinamide                                                                                                                                                                                                                                                                                                                   | C00153          | 1.064                      | 0.774            | 0.486            | 0.921 | 0.682                   | 0.004            | 0.027            | 0.282 | 0.927           | 0.548            | 0.552            | 0.989 |
|                | terephthalic acid                                                                                                                                                                                                                                                                                                              | C06337          | 0.671                      | 0.028            | 0.025            | 0.482 | 0.831                   | 0.139            | 0.123            | 0.660 | 0.873           | 0.275            | 0.190            | 0.989 |
|                | propane-1,3-diol NIST                                                                                                                                                                                                                                                                                                          | C02457          | 1.240                      | 0.196            | 0.186            | 0.713 | 0.984                   | 0.878            | 0.987            | 0.964 | 1.013           | 0.947            | 0.998            | 0.989 |
|                |                                                                                                                                                                                                                                                                                                                                |                 |                            |                  |                  |       |                         |                  |                  |       |                 |                  |                  |       |
|                | <sup>a</sup> KEGG identifier obtained from the KEGG resource database; MI/Sham = ratio of the mean signal in MI and Sham rabbits; Raw data and Log2 data p values represent comparisons between MI and Sham signals using Welch's t-test; FDR = False Discovery Rate as calculated using the Benjamini-Hochberg procedure [77] |                 |                            |                  |                  |       |                         |                  |                  |       |                 |                  |                  |       |

**Supplement Table 2. Metabolites Identified in the Serum of MI and Sham Rabbits<sup>a</sup>**

|                |                        | KEGG       | MI/Sham | Raw data | Log data |       |
|----------------|------------------------|------------|---------|----------|----------|-------|
| Network module | Compound               | Identifier | Mean    | p value  | p value  | FDR   |
| Amines         | phosphoethanolamine    | C00346     | 1.125   | 0.663    | 0.620    | 0.815 |
|                | lactamide              |            | 1.076   | 0.772    | 0.881    | 0.872 |
|                | hydroxylamine          | C00192     | 1.305   | 0.093    | 0.098    | 0.631 |
|                | ethanolamine           | C00189     | 1.053   | 0.697    | 0.679    | 0.843 |
| Amino Acids    | oxoproline             | C01879     | 1.120   | 0.440    | 0.427    | 0.723 |
|                | n-acetylglutamate      | C00624     | 1.355   | 0.165    | 0.166    | 0.631 |
|                | methionine             | C00073     | 0.849   | 0.397    | 0.589    | 0.698 |
|                | lysine                 | C00047     | 0.739   | 0.355    | 0.119    | 0.691 |
|                | leucine                | C00123     | 0.909   | 0.576    | 0.814    | 0.784 |
|                | kynurenic acid         | C01717     | 1.571   | 0.205    | 0.250    | 0.631 |
|                | isoleucine             | C00407     | 1.016   | 0.913    | 0.700    | 0.958 |
|                | hippuric acid          | C01586     | 1.121   | 0.735    | 0.694    | 0.854 |
|                | glycine                | C00037     | 1.050   | 0.780    | 0.648    | 0.872 |
|                | glutamine              | C00064     | 1.009   | 0.977    | 0.760    | 0.990 |
|                | glutamic acid          | C00025     | 1.082   | 0.522    | 0.518    | 0.758 |
|                | creatinine             | C00791     | 1.001   | 0.990    | 0.981    | 0.990 |
|                | beta-alanine           | C00099     | 0.589   | 0.023    | 0.014    | 0.631 |
|                | aspartic acid          | C00049     | 0.997   | 0.990    | 0.733    | 0.990 |
|                | asparagine             | C00152     | 1.104   | 0.682    | 0.384    | 0.832 |
|                | alanine                | C00041     | 0.800   | 0.394    | 0.341    | 0.698 |
|                | ornithine              | C00077     | 0.255   | 0.310    | 0.152    | 0.679 |
|                | valine                 | C00183     | 0.915   | 0.572    | 0.768    | 0.784 |
|                | tyrosine               | C00082     | 1.232   | 0.141    | 0.162    | 0.631 |
|                | tryptophan             | C00078     | 1.149   | 0.459    | 0.415    | 0.725 |
|                | trans-4-hydroxyproline | C01157     | 0.812   | 0.371    | 0.800    | 0.691 |
|                | threonine              | C00188     | 1.136   | 0.452    | 0.415    | 0.725 |
|                | taurine                | C00245     | 0.485   | 0.384    | 0.480    | 0.691 |
|                | serine                 | C00065     | 1.185   | 0.306    | 0.387    | 0.679 |
|                | phenylethylamine       | C05332     | 1.045   | 0.909    | 0.769    | 0.958 |
|                | phenylalanine          | C00079     | 1.174   | 0.241    | 0.289    | 0.631 |
| Aromatics      | salicylic acid         | C00805     | 0.990   | 0.985    | 0.692    | 0.990 |
|                | benzoic acid           | C00180     | 0.854   | 0.477    | 0.447    | 0.732 |
| Fatty Acids    | stearic acid           | C01530     | 1.262   | 0.048    | 0.075    | 0.631 |

**Supplement Table 2. Metabolites Identified in the Serum of MI and Sham Rabbits<sup>a</sup>**

|                   |                           | KEGG       | MI/Sham | Raw data | Log data |       |
|-------------------|---------------------------|------------|---------|----------|----------|-------|
| Network module    | Compound                  | Identifier | Mean    | p value  | p value  | FDR   |
|                   | pelargonic acid           | C01601     | 1.281   | 0.078    | 0.123    | 0.631 |
|                   | palmitoleic acid          | C08362     | 0.774   | 0.317    | 0.214    | 0.681 |
|                   | palmitic acid             | C00249     | 1.208   | 0.073    | 0.093    | 0.631 |
|                   | oleic acid                | C00712     | 0.765   | 0.164    | 0.184    | 0.631 |
|                   | myristic acid             | C06424     | 0.994   | 0.975    | 0.645    | 0.990 |
|                   | linolenic acid            | C06427     | 1.089   | 0.715    | 0.638    | 0.845 |
|                   | linoleic acid             | C01595     | 0.941   | 0.783    | 0.577    | 0.872 |
|                   | lauric acid               | C02679     | 1.119   | 0.502    | 0.458    | 0.752 |
|                   | hexadecane                |            | 1.036   | 0.882    | 0.714    | 0.948 |
|                   | heptadecanoic acid        |            | 1.096   | 0.556    | 0.635    | 0.778 |
|                   | capric acid               | C01571     | 0.946   | 0.739    | 0.885    | 0.854 |
|                   | arachidic acid            | C06425     | 1.042   | 0.811    | 0.734    | 0.897 |
| Monoacylglycerols | 1-monostearin             | D01947     | 1.272   | 0.252    | 0.343    | 0.633 |
|                   | 1-monopalmitin            | C01885     | 1.120   | 0.642    | 0.949    | 0.815 |
|                   | 1-monoolein               |            | 0.609   | 0.369    | 0.414    | 0.691 |
| Organic Acids     | threonic acid             | C01620     | 1.809   | 0.007    | 0.038    | 0.631 |
|                   | pyrrole-2-carboxylic acid | C05942     | 0.876   | 0.647    | 0.970    | 0.815 |
|                   | oxalic acid               | C00209     | 1.510   | 0.072    | 0.256    | 0.631 |
|                   | isothreonic acid          | C00639     | 1.419   | 0.120    | 0.145    | 0.631 |
|                   | glycolic acid             | C00160     | 1.295   | 0.074    | 0.101    | 0.631 |
|                   | glyceric acid             | C00258     | 1.290   | 0.333    | 0.979    | 0.689 |
|                   | aminomalonnate            | C00872     | 1.014   | 0.948    | 0.776    | 0.985 |
|                   | 3-hydroxybutyric acid     | C01089     | 1.220   | 0.664    | 0.395    | 0.815 |
|                   | 2-picolinic acid          | C10164     | 1.185   | 0.706    | 0.600    | 0.845 |
|                   | 2-ketoisocaproic acid     | C00233     | 1.151   | 0.447    | 0.398    | 0.725 |
|                   | 2-hydroxyglutaric acid    | C02630     | 1.214   | 0.385    | 0.404    | 0.691 |
|                   | 4-hydroxybutyric acid     | C00989     | 1.216   | 0.207    | 0.252    | 0.631 |
| Phosphates        | phosphate                 | C00009     | 0.605   | 0.100    | 0.039    | 0.631 |
|                   | methanolphosphate         |            | 1.345   | 0.424    | 0.351    | 0.712 |
| Purines           | inosine                   | C00294     | 1.128   | 0.591    | 0.405    | 0.786 |
|                   | hypoxanthine              | C00262     | 0.698   | 0.316    | 0.499    | 0.681 |
|                   | adenosine-5-monophosphate | C00020     | 0.833   | 0.426    | 0.747    | 0.712 |
| Pyrimidines       | uridine                   | C00299     | 1.313   | 0.183    | 0.189    | 0.631 |

**Supplement Table 2. Metabolites Identified in the Serum of MI and Sham Rabbits<sup>a</sup>**

|                  |                          | KEGG       | MI/Sham | Raw data | Log data |       |
|------------------|--------------------------|------------|---------|----------|----------|-------|
| Network module   | Compound                 | Identifier | Mean    | p value  | p value  | FDR   |
|                  | uracil                   | C00106     | 1.147   | 0.466    | 0.543    | 0.729 |
|                  | pseudo uridine           | C02067     | 0.642   | 0.189    | 0.182    | 0.631 |
| Sterols          | tocopherol alpha-        | C00376     | 0.938   | 0.781    | 0.740    | 0.872 |
|                  | dihydrocholesterol       | C12978     | 1.207   | 0.230    | 0.481    | 0.631 |
|                  | dehydroabietic acid      | C12078     | 1.140   | 0.237    | 0.289    | 0.631 |
|                  | cholesterol              | C00187     | 1.227   | 0.242    | 0.260    | 0.631 |
| Sugars           | xylose                   | C00181     | 1.403   | 0.276    | 0.284    | 0.644 |
|                  | sucrose                  | C00089     | 1.533   | 0.425    | 0.290    | 0.712 |
|                  | ribose                   | C00121     | 1.047   | 0.738    | 0.653    | 0.854 |
|                  | mannose                  | C00159     | 1.228   | 0.066    | 0.106    | 0.631 |
|                  | maltose                  | C00208     | 1.363   | 0.087    | 0.089    | 0.631 |
|                  | lyxose                   | C00476     | 1.410   | 0.129    | 0.125    | 0.631 |
|                  | glucose                  | C00221     | 1.198   | 0.108    | 0.160    | 0.631 |
|                  | conduritol-beta-epoxide  |            | 1.308   | 0.158    | 0.217    | 0.631 |
|                  | cellobiose               | C01971     | 1.064   | 0.780    | 0.792    | 0.872 |
|                  | 3,6-anhydro-D-galactose  | C06474     | 1.322   | 0.078    | 0.057    | 0.631 |
|                  | 1,5-anhydroglucitol      | C07326     | 1.444   | 0.087    | 0.341    | 0.631 |
| Sugar Acids      | ribonic acid             | C01685     | 0.929   | 0.686    | 0.968    | 0.833 |
|                  | hexuronic acid           |            | 0.970   | 0.894    | 0.849    | 0.948 |
|                  | dehydroascorbic acid     | C05422     | 1.197   | 0.005    | 0.005    | 0.631 |
| Sugar Alcohols   | xylitol                  | C00379     | 1.622   | 0.185    | 0.126    | 0.631 |
|                  | sorbitol                 | C00794     | 1.236   | 0.213    | 0.222    | 0.631 |
|                  | pinitol                  | C03844     | 1.820   | 0.218    | 0.215    | 0.631 |
|                  | myo-inositol             | C00137     | 1.541   | 0.056    | 0.066    | 0.631 |
|                  | lyxitol                  | C00532     | 1.347   | 0.098    | 0.105    | 0.631 |
|                  | isothreitol              | C16884     | 1.996   | 0.040    | 0.089    | 0.631 |
|                  | hexitol                  | C00392     | 1.392   | 0.345    | 0.704    | 0.691 |
|                  | glycerol                 | C00116     | 0.998   | 0.986    | 0.812    | 0.990 |
|                  | arabitol                 | C01904     | 1.328   | 0.140    | 0.200    | 0.631 |
| Sugar Phosphates | glycerol-alpha-phosphate | C03189     | 1.576   | 0.110    | 0.205    | 0.631 |
|                  | glucose-1-phosphate      | C00103     | 1.152   | 0.424    | 0.369    | 0.712 |
| Sulfate          | sulfuric acid            | C00059     | 0.892   | 0.719    | 0.875    | 0.846 |
| TCA Cycle        | succinic acid            | C00042     | 0.855   | 0.436    | 0.446    | 0.719 |

**Supplement Table 2. Metabolites Identified in the Serum of MI and Sham Rabbits<sup>a</sup>**

|                |                                                                                                                                                                                                                                                                                                                                       | KEGG       | MI/Sham | Raw data | Log data |       |
|----------------|---------------------------------------------------------------------------------------------------------------------------------------------------------------------------------------------------------------------------------------------------------------------------------------------------------------------------------------|------------|---------|----------|----------|-------|
| Network module | Compound                                                                                                                                                                                                                                                                                                                              | Identifier | Mean    | p value  | p value  | FDR   |
|                | pyruvic acid                                                                                                                                                                                                                                                                                                                          | C00022     | 0.653   | 0.256    | 0.448    | 0.633 |
|                | malic acid                                                                                                                                                                                                                                                                                                                            | C00711     | 0.539   | 0.060    | 0.039    | 0.631 |
|                | lactic acid                                                                                                                                                                                                                                                                                                                           | C01432     | 0.877   | 0.660    | 0.781    | 0.815 |
|                | isocitric acid                                                                                                                                                                                                                                                                                                                        | C00451     | 0.257   | 0.349    | 0.274    | 0.691 |
|                | fumaric acid                                                                                                                                                                                                                                                                                                                          | C00122     | 0.565   | 0.170    | 0.421    | 0.631 |
|                | citric acid                                                                                                                                                                                                                                                                                                                           | C00158     | 0.291   | 0.354    | 0.326    | 0.691 |
|                | alpha-ketoglutarate                                                                                                                                                                                                                                                                                                                   | C00026     | 0.845   | 0.541    | 0.933    | 0.773 |
|                | aconitic acid                                                                                                                                                                                                                                                                                                                         | C00417     | 1.014   | 0.967    | 0.485    | 0.990 |
| Urea Cycle     | urea                                                                                                                                                                                                                                                                                                                                  | C00086     | 1.123   | 0.216    | 0.266    | 0.631 |
|                | hydroxycarbamate NIST                                                                                                                                                                                                                                                                                                                 |            | 1.192   | 0.321    | 0.300    | 0.681 |
|                | propane-1,3-diol NIST                                                                                                                                                                                                                                                                                                                 | C02457     | 1.083   | 0.652    | 0.529    | 0.815 |
|                | <sup>a</sup> KEGG identifier obtained from the KEGG resource database; MI/Sham = ratio of the mean signal in MI and Sham rabbits;<br>Raw data and Log2 data p values represent comparisons between MI and Sham signals using Welch's t-test; FDR = False<br>Discovery Rate as calculated using the Benjamini-Hochberg procedure [77]. |            |         |          |          |       |
