# Supplementary material
Source: PubMed Central journal article supplement (PMC6445392)

Pre Cryo-MI

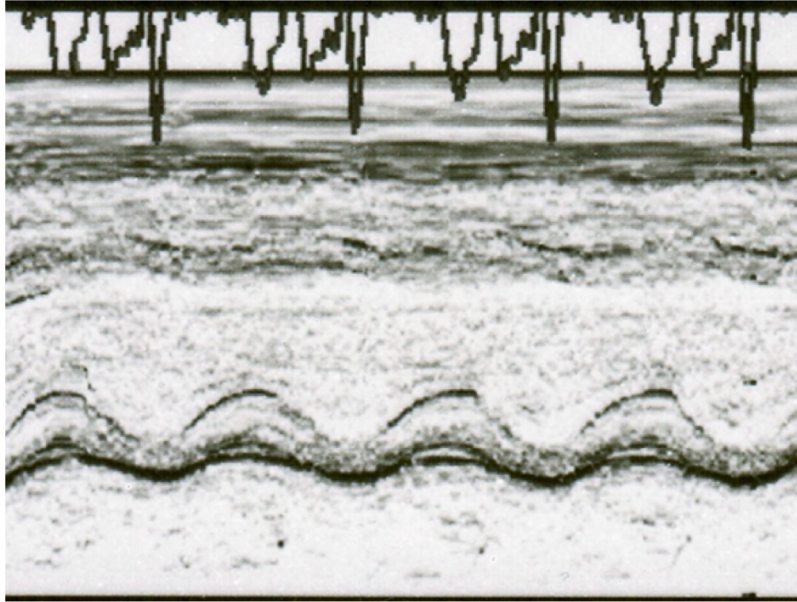

Post Cryo-MI

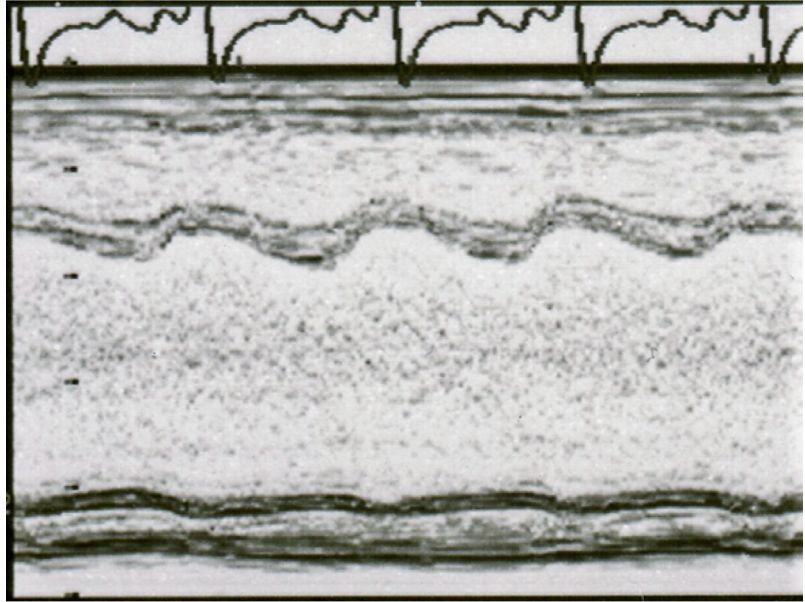

Fig. 6 Suppl

Supplement: NIHMS1012093-supplement-1.pdf [file NIHMS1012093-supplement-1.pdf]
